# Supplementary material for: Valorisation of Three Underutilised Native Australian Plants: Phenolic and Organic Acid Profiles and In Vitro Antimicrobial Activity
Source: MDPI journal article supplement (doi:10.3390/foods12030623), 2023-02-01
Supplement: s1 [file s1]

## Supplementary Material

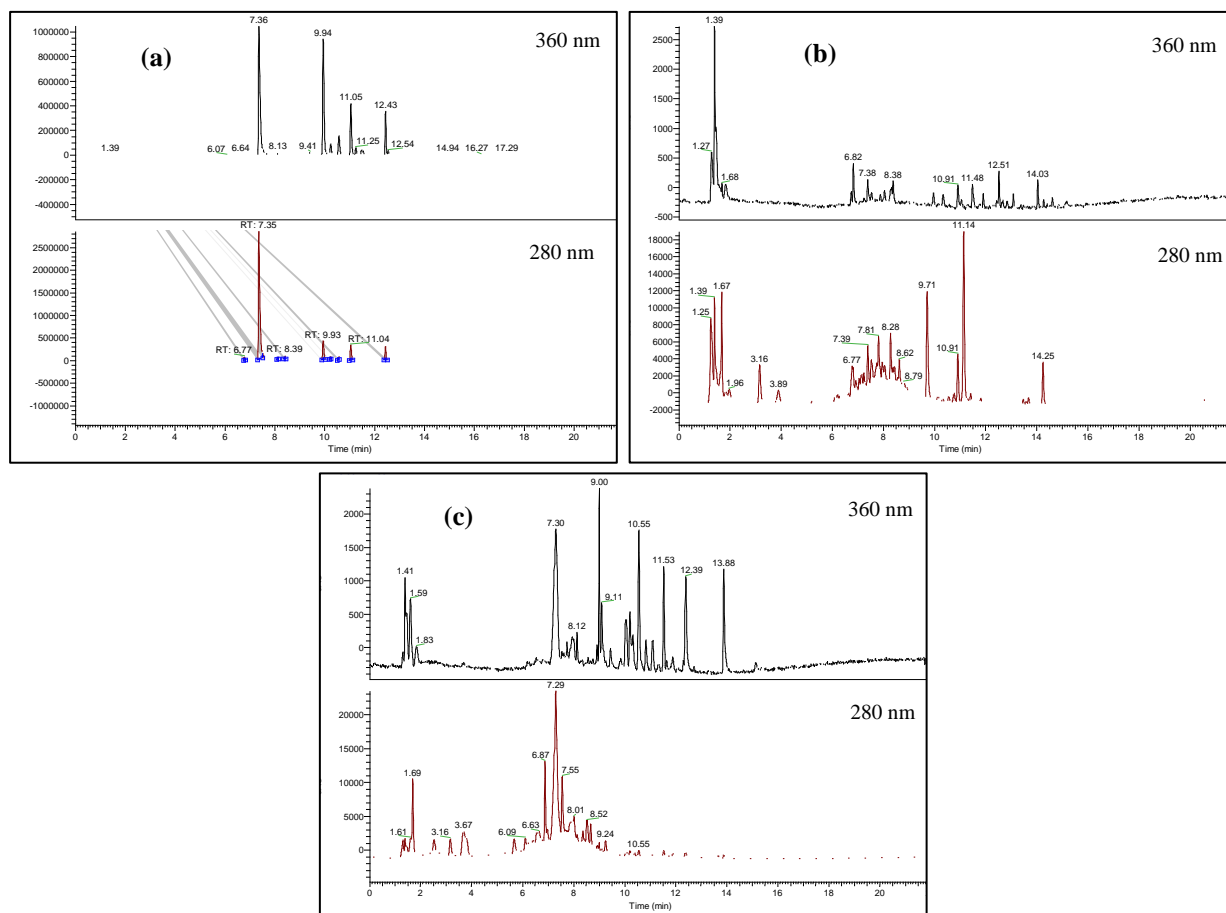

**Figure S1.** Representative UHPLC-UV chromatograms of (a) *Tasmannia lanceolata*, (b) *Diploglottis bracteata*, and (c) *Syzygium aqueum* water extracts at 280 and 360 nm.

**Table S1.** Unknown phenolic compounds in the water extract of *Tasmannia lanceolata* leaves characterized by HRAM-UHPLC-Q/Orbitrap-MS/MS in negative ion mode.

| No. | UV RT<br>(min) | [M-H] <sup>-</sup><br>(m/z) | MS <sup>2</sup> Product Ions (m/z)                                                                |
|-----|----------------|-----------------------------|---------------------------------------------------------------------------------------------------|
| 1   | 5.00           | 331.1025                    | 135.0444; 85.0285                                                                                 |
| 2   | 5.69           | 395.1913                    | 177.0553; 149.0604; 161.0603; 109.0287; 283.0837                                                  |
| 3   | 6.19           | 461.1292                    | 461.1229; 152.0111; 135.0449; 271.0970                                                            |
| 4   | 6.53           | 345.1181                    | 133.0290; 161.0244; 293.0095                                                                      |
| 5   | 7.19           | 361.0956                    | 361.0949; 96.9592; 150.0316; 194.0211; 209.0446                                                   |
| 6   | 7.68           | 595.1268                    | 595.1203; 299.0187; 491.1847; 432.0618; 355.0767; 149.0604                                        |
| 7   | 7.82           | 315.1078                    | 125.0237; 145.0289; 96.9592; 289.0711                                                             |
| 8   | 7.82           | 489.1961                    | 145.0289; 101.0236; 443.1847; 281.1375                                                            |
| 9   | 7.87           | 373.1467                    | 145.0290; 125.0238; 96.9593; 117.0339; 345.0983; 289.0707                                         |
| 10  | 8.01           | 355.1025                    | 160.0162; 132.0212; 175.0396; 259.0603                                                            |
| 11  | 8.01           | 439.1817                    | 101.0236; 205.0710                                                                                |
| 12  | 8.49           | 345.1006                    | 345.0998; 96.9592; 135.0445; 269.1744                                                             |
| 13  | 9.11           | 441.1971                    | 165.0551; 311.0543; 150.0316; 101.0238                                                            |
| 14  | 9.11           | 593.1468                    | 893.1408; 311.0549; 165.0551; 101.0237                                                            |
| 15  | 9.14           | 337.0918                    | 337.0885; 179.0709; 85.0286; 93.0338; 275.1642; 127.0398                                          |
| 16  | 9.23           | 319.0451                    | 109.0288; 151.0395; 183.0290; 97.0286; 287.0543                                                   |
| 17  | 9.41           | 475.1813                    | 327.0500; 96.9592; 361.1638; 101.0236; 115.0394; 131.0344; 143.0342; 165.0549; 205.0708; 421.1788 |
| 18  | 9.83           | 345.1001                    | 345.0999; 96.9592; 135.0446; 285.0398; 317.1033                                                   |
| 19  | 10.23          | 563.1383                    | 563.1376; 311.0553; 283.0606; 427.2029                                                            |
| 20  | 11.75          | 497.1074                    | 177.0189; 341.0650; 109.0287; 161.0239; 281.0439; 326.1107                                        |
| 21  | 12.43          | 329.1050                    | 329.1048; 96.9591; 275.1632; 135.0443                                                             |
| 22  | 12.54          | 401.0873                    | 401.0880; 268.0377; 240.0422                                                                      |
| 23  | 12.80          | 459.2228                    | 101.0236; 85.0285; 113.0237; 161.0449; 413.2223; 277.1803                                         |
| 24  | 12.97          | 471.1864                    | 263.1286; 219.1385; 96.9592; 331.1206; 203.1070                                                   |
| 25  | 13.20          | 459.2231                    | 96.9592; 331.1204; 269.1749                                                                       |
| 26  | 13.32          | 329.1055                    | 329.1051; 96.9592; 219.0689                                                                       |
| 27  | 13.51          | 447.0724                    | 447.0762; 295.0244; 219.0662; 135.0446; 355.1127                                                  |
| 28  | 13.94          | 317.1419                    | 317.1417; 193.0864; 271.1002                                                                      |
| 29  | 13.94          | 507.2429                    | 115.0394; 131.0344; 143.0343; 327.0860; 205.0704                                                  |
| 30  | 14.38          | 643.3035                    | 109.0290; 305.1943; 515.2770; 242.0568                                                            |
| 31  | 15.52          | 265.1440                    | 265.1440; 221.1535; 175.1123; 177.1278; 161.0965; 191.1434; 205.1229; 109.0652; 97.0285; 147.0806 |
| 32  | 19.16          | 116.9277                    | 99.9249; 83.9298; 100.9254; 112.9850                                                              |
| 33  | 19.69          | 540.3268                    | 255.2324; 224.0683; 168.0427                                                                      |

**Table S2.** Unknown phenolic compounds in the water extract of *Diploglottis bracteata* fruits characterized by HRAM-UHPLC-Q/Orbitrap-MS/MS in negative ion mode.

| No. | UV RT<br>(min) | [M-H] <sup>-</sup><br>(m/z) | MS <sup>2</sup> Product Ions (m/z)                                                      |
|-----|----------------|-----------------------------|-----------------------------------------------------------------------------------------|
| 1   | 1.68           | 249.0248                    | 249.0239; 128.0347; 216.9429                                                            |
| 2   | 1.83           | 304.9902                    | 304.9898; 133.0135; 115.0028; 96.9687; 298.8889                                         |
| 3   | 5.23           | 299.0767                    | 92.0253; 251.9612; 229.0750; 198.0424                                                   |
| 4   | 6.10           | 203.0824                    | 116.0501                                                                                |
| 5   | 6.21           | 342.0864                    | 134.0468; 107.0357; 189.9807; 233.9709; 223.9413                                        |
| 6   | 6.38           | 505.1847                    | 153.0912; 297.1304                                                                      |
| 7   | 6.64           | 281.1237                    | 156.9583; 263.1076; 118.9920; 276.0995                                                  |
| 8   | 6.74           | 293.1235                    | 245.0817; 113.0602; 237.1484                                                            |
| 9   | 6.81           | 444.1646                    | 444.4553; 136.0399; 92.0496; 221.0915; 402.1343                                         |
| 10  | 6.92           | 305.0659                    | 305.0647; 137.0240; 109.0288; 93.0337; 139.0396; 165.0189; 219.0652                     |
| 11  | 7.06           | 413.1660                    | 189.1278; 251.1280; 381.1966; 295.1151                                                  |
| 12  | 7.23           | 220.0974                    | 220.0978; 117.0340; 89.0382                                                             |
| 13  | 7.53           | 325.0918                    | 325.0878; 117.0339; 145.0290; 287.0555; 167.0345                                        |
| 14  | 7.66           | 427.1820                    | 101.0235; 85.0284; 113.0236; 168.9882; 235.1176                                         |
| 15  | 8.04           | 519.2064                    | 165.0917; 217.1062                                                                      |
| 16  | 8.27           | 461.1658                    | 165.0914; 101.0235; 289.0707; 85.0284                                                   |
| 17  | 8.38           | 519.2058                    | 165.0916; 325.0336; 487.0818                                                            |
| 18  | 8.62           | 401.0870                    | 401.0808; 151.0396; 109.0288; 137.0239; 203.0710                                        |
| 19  | 8.71           | 277.1285                    | 277.1291; 235.1183; 168.9888; 257.0996; 148.9088                                        |
| 20  | 8.71           | 323.1334                    | 235.1183; 168.9888; 161.0447; 291.0531; 257.0996                                        |
| 21  | 8.71           | 375.1650                    | 235.1183; 168.9888; 291.0518; 355.0845                                                  |
| 22  | 8.79           | 521.2219                    | 521.2164; 101.0235; 143.0343; 205.0710; 89.0233; 319.0074; 385.0909; 511.1870           |
| 23  | 9.71           | 865.1759                    | 865.1764; 227.0710; 261.0404; 589.0918; 177.0552                                        |
| 24  | 9.90           | 311.1124                    | 311.1117; 269.1029; 168.9888; 161.0449; 251.0915; 114.9484                              |
| 25  | 9.90           | 357.1181                    | 269.1028; 168.9888; 291.0840; 325.0346; 148.09091                                       |
| 26  | 9.90           | 711.2048                    | 269.1028; 168.9888; 161.0449; 80.9158; 148.9091; 291.0841; 301.0322; 592.1174; 358.9947 |
| 27  | 10.33          | 301.1758                    | 301.1738; 128.0349; 271.0240; 84.0442                                                   |
| 28  | 10.33          | 639.1452                    | 639.1440; 316.0210; 331.0419; 271.0240                                                  |
| 29  | 11.05          | 321.1541                    | 141.0913; 95.3013; 247.9760                                                             |
| 30  | 11.05          | 547.2366                    | 89.0234; 99.0079; 191.0553; 149.0450; 459.0798                                          |

**Table S2.** *Continued.*

| No. | UV RT (min) | [M-H] <sup>-</sup> (m/z) | MS <sup>2</sup> Product Ions (m/z)                        |
|-----|-------------|--------------------------|-----------------------------------------------------------|
| 31  | 11.48       | 455.2129                 | 168.9888; 101.0235; 113.0236; 85.0284; 263.1487           |
| 32  | 11.48       | 415.1965                 | 168.9888; 101.0235                                        |
| 33  | 12.04       | 417.2120                 | 152.0111; 168.9889; 283.1534; 229.1436; 325.1699          |
| 34  | 13.08       | 351.1647                 | 319.0811; 289.1421; 221.1529                              |
| 35  | 13.47       | 609.1736                 | 255.0661; 121.0288; 563.1646                              |
| 36  | 13.47       | 581.1781                 | 121.0289; 148.0526; 227.0698; 279.0643                    |
| 37  | 13.57       | 529.2577                 | 305.2124                                                  |
| 38  | 13.67       | 263.1285                 | 122.0367; 203.1071; 143.1070; 253.0525; 188.0832          |
| 39  | 14.03       | 483.2434                 | 101.0235; 113.0236; 168.9886; 347.1106; 291.1791; 85.0285 |
| 40  | 14.27       | 425.1732                 | 219.1014; 147.0439; 289.1428                              |
| 41  | 14.33       | 351.1646                 | 143.1067                                                  |
| 42  | 15.15       | 186.1030                 | 186.1024; 170.0731                                        |
| 43  | 15.90       | 511.2732                 | 101.0235; 85.0284                                         |

**Table S3.** Unknown phenolic compounds in the water extract of *Syzygium aqueum* fruits characterized by HRAM-UHPLC-Q/Orbitrap-MS/MS in negative ion mode.

| No. | UV RT<br>(min) | [M-H] <sup>-</sup><br>(m/z) | MS <sup>2</sup> Product Ions (m/z)                                                                                                                                   |
|-----|----------------|-----------------------------|----------------------------------------------------------------------------------------------------------------------------------------------------------------------|
| 1   | 6.09           | 203.0822                    | 116.0500; 95.9752; 142.0655; 203.0820; 127.9435                                                                                                                      |
| 2   | 6.39           | 285.0612                    | 285.0590; 108.0210; 125.0238; 177.0190; 119.0496; 96.9593; 207.9453;<br>241.9102                                                                                     |
| 3   | 6.63           | 475.0325                    | 367.0038                                                                                                                                                             |
| 4   | 7.30           | 935.0509                    | 935.0545; 284.0318; 285.0385; 166.0265; 125.0235; 149.0237; 147.0081;<br>241.0499; 255.0294; 217.0500; 199.0394; 329.0820; 447.0875; 465.0947;<br>917.0438; 519.0116 |
| 5   | 7.61           | 531.0835                    | 125.0237; 177.0187; 169.0136; 137.0237; 243.0295; 301.0340; 423.0760                                                                                                 |
| 6   | 7.74           | 387.1676                    | 387.1600; 125.0239; 177.0191; 169.0139; 243.0296; 149.0240; 355.0766;<br>269.0447; 111.0084; 268.0371; 345.0772                                                      |
| 7   | 7.93           | 479.1180                    | 479.1092; 299.0545; 298.0474; 283.0244; 284.0312; 284.0312; 149.0238;<br>165.0188; 177.0189; 137.0238; 317.0616; 423.0624; 461.1016                                  |
| 8   | 8.12           | 305.0691                    | 96.9592; 125.0238; 169.0137; 177.0188; 243.0294; 305.0660                                                                                                            |
| 9   | 8.37           | 245.0118                    | 165.0189; 183.0294; 139.0394                                                                                                                                         |
| 10  | 8.91           | 436.0762                    | 357.0924; 327.0463; 387.1142; 417.1259; 121.0291; 152.0107; 295.1164                                                                                                 |
| 11  | 9.24           | 319.0446                    | 97.0285; 139.0393; 153.0187; 115.0392; 208.9536                                                                                                                      |
| 12  | 11.66          | 477.0961                    | 447.0988; 255.0297; 227.0344; 125.0236; 284.0306; 169.0138; 177.0184;<br>327.0812                                                                                    |
| 13  | 11.88          | 479.1115                    | 151.0033; 271.0610; 119.0496; 344.0466                                                                                                                               |
| 14  | 13.49          | 549.3326                    | 137.0238; 165.0187; 503.3309                                                                                                                                         |
| 15  | 13.67          | 263.1283                    | 122.0365; 203.1069; 136.0522; 188.0832                                                                                                                               |
| 16  | 15.13          | 186.1030                    | 128.0377; 186.1026                                                                                                                                                   |
| 17  | 16.40          | 305.0807                    | 108.0210; 211.0392; 183.0436; 247.0756                                                                                                                               |

**Table S4.** Retention time and mass spectra data of commercial standards analysed by HRAM-UHPLC-Q/Orbitrap-MS/MS in negative ion mode.

| No. | UV<br>RT<br>(min) | [M-H] <sup>-</sup><br>(m/z) | MS <sup>2</sup> Product Ions (m/z)                                                                                                    | Compound              |
|-----|-------------------|-----------------------------|---------------------------------------------------------------------------------------------------------------------------------------|-----------------------|
| 1   | 2.53              | 169.0130                    | 169.0136; 125.0237; 119.0493; 117.0337; 91.0542<br>289.0707; 109.0285; 123.0442; 125.0235; 245.0812; 137.0236;                        | Gallic acid           |
| 2   | 7.37              | 289.0708                    | 151.0392; 203.0705; 97.0285; 205.0496; 159.0443; 83.0127;<br>179.0338; 221.0807; 168.9873; 85.0285                                    | Catechin              |
| 3   | 7.37              | 353.0868                    | 353.0810; 191.0555; 85.0284; 93.0336; 127.0393; 135.0444;<br>87.0077; 280.9485; 248.0839                                              | Chlorogenic acid      |
| 4   | 7.99              | 179.0342                    | 179.0340; 135.0442; 134.0366; 89.0386; 136.0475; 108.0210;<br>117.0339; 168.9885                                                      | Caffeic acid          |
| 5   | 8.27              | 289.0708                    | 289.0707; 109.0285; 123.0442; 137.0236; 125.0235; 97.0285;<br>151.0393; 245.0812; 95.0492; 203.0704; 159.0443; 83.0127;<br>93.0334    | Epicatechin           |
| 6   | 9.56              | 163.0393                    | 163.0392; 93.0335; 119.0493; 117.0337; 91.542                                                                                         | p-Coumaric acid       |
| 7   | 9.95              | 609.1428                    | 609.1401; 300.0271; 301.0330; 426.9658<br>300.9978; 145.0288; 173.0236; 200.0107; 117.0337; 283.9954;                                 | Rutin                 |
| 8   | 10.27             | 300.9979                    | 185.0236; 163.0393; 216.0056; 161.0237; 157.0288; 133.0288;<br>245.0080                                                               | Ellagic acid          |
| 9   | 10.55             | 463.0874                    | 463.0859; 300.0268; 271.0243; 255.0293; 301.0321; 151.0029;<br>243.0293; 178.9978; 272.0282;                                          | Quercetin-3-glucoside |
| 10  | 12.38             | 317.0291                    | 317.0288; 109.0286; 137.0237; 151.0030; 107.0130; 83.0127;<br>178.0998; 315.0134; 125.0236; 287.0181; 271.0236                        | Myricetin             |
| 11  | 13.84             | 285.0397                    | 285.0396; 133.0287; 132.0211; 107.0129; 134.0319; 83.0127;<br>151.0029; 175.0390; 121.0286; 199.0389; 241.0486                        | Luteolin              |
| 12  | 13.87             | 301.0344                    | 301.0342; 151.0030; 107.0129; 93.0335; 121.0287; 178.9979;<br>139.0393; 168.9885                                                      | Quercetin             |
| 13  | 15.10             | 285.0396                    | 285.0396; 93.0335; 117.0337; 143.0495; 159.0444; 108.0208;<br>145.0287; 227.0339; 211.0390; 255.0291; 131.0495; 183.0439;<br>267.0269 | Kaempferol            |

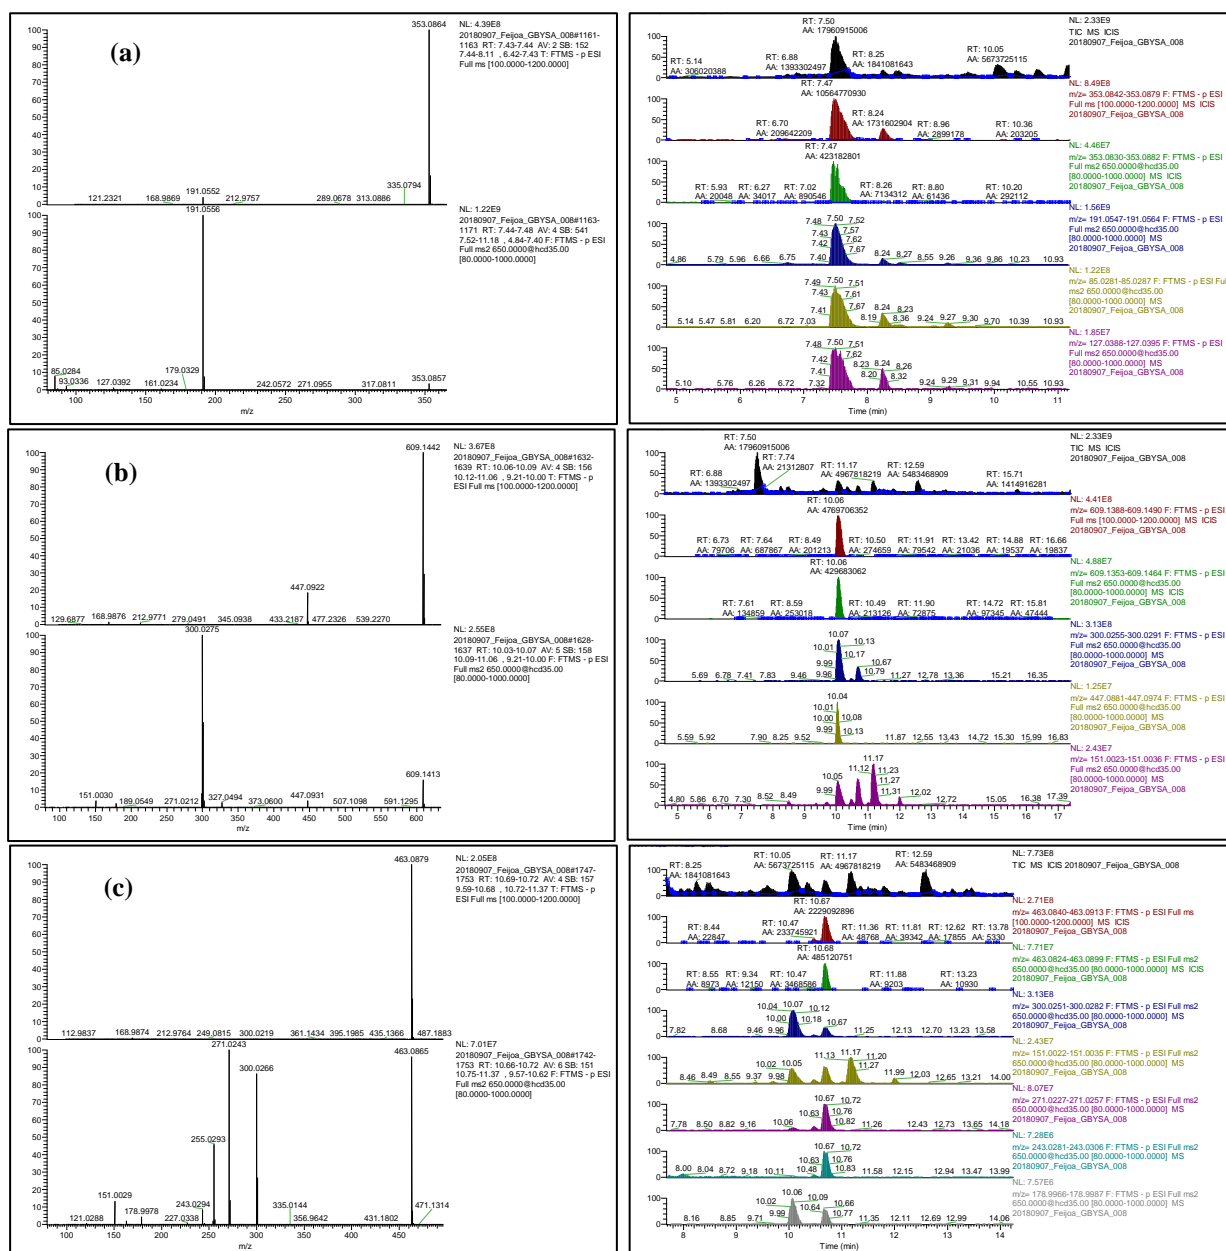

**Figure S2.** Full-MS scan (m/z 100 – 1200) and product ion mass spectra of (a) chlorogenic acid (m/z 353.0864), (b) rutin (m/z 609.1442), and (c) quercetin-3-O-glucoside (m/z 463.0879) in *Tasmannia lanceolata* water extract by HRAM-UHPLC-Q/Orbitrap-MS/MS in negative ion mode.

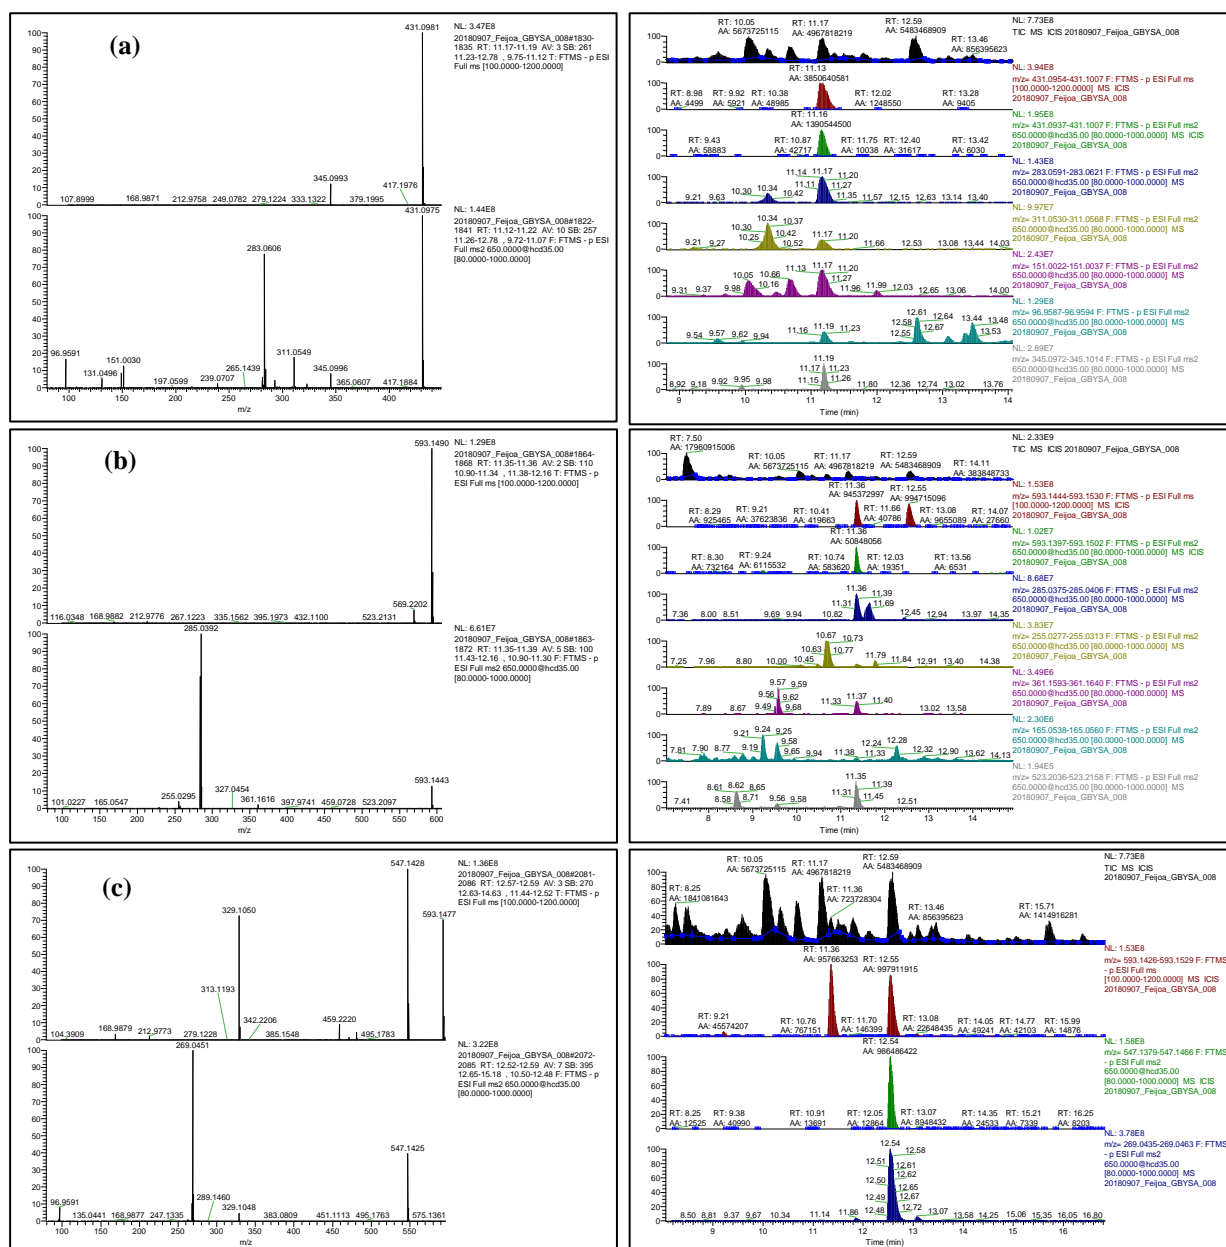

**Figure S3.** Full-MS scan (m/z 100 – 1200) and product ion mass spectra of (a) vitexin/isovitexin (m/z 431.0981), (b) kaempferol glycoside (m/z 593.1490), and (c) apigenin dihexoside (m/z 593.1477) in *Tasmannia lanceolata* water extract by HRAM-UHPLC-Q/Orbitrap-MS/MS in negative ion mode.



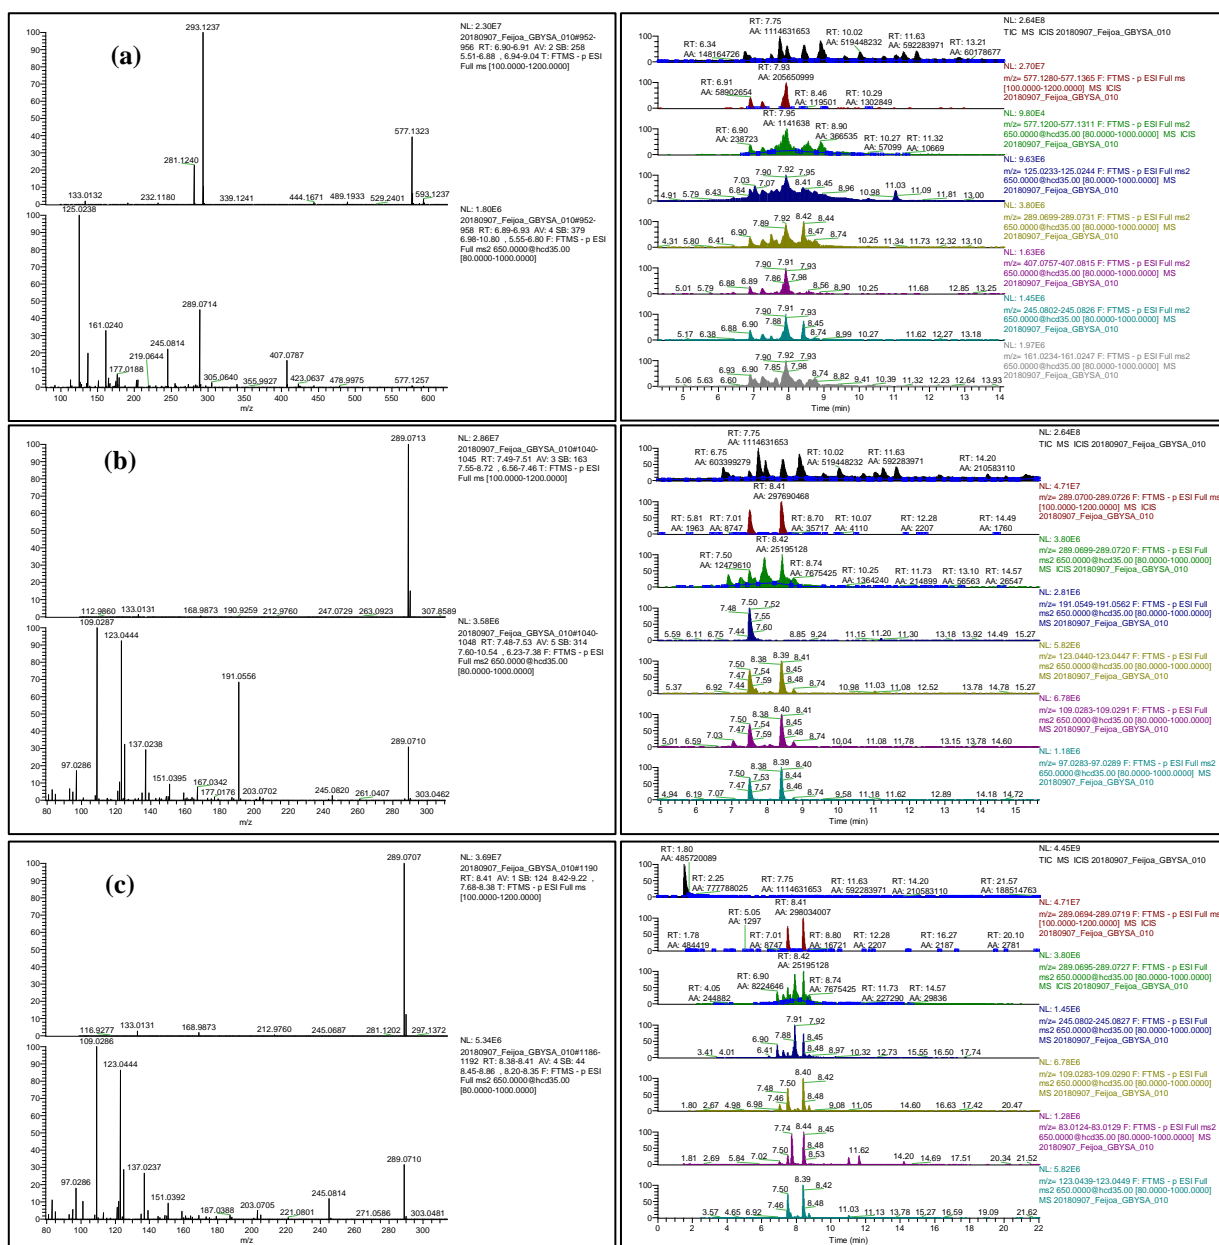

**Figure S4.** Full-MS scan (m/z 100 – 1200) and product ion mass spectra of (a) B-type procyanidin dimer (m/z 577.1323), (b) catechin (m/z 289.0713), and (c) epicatechin (m/z 289.0707) in *Diploglottis bracteata* water extract by HRAM-UHPLC-Q/Orbitrap-MS/MS in negative ion mode.

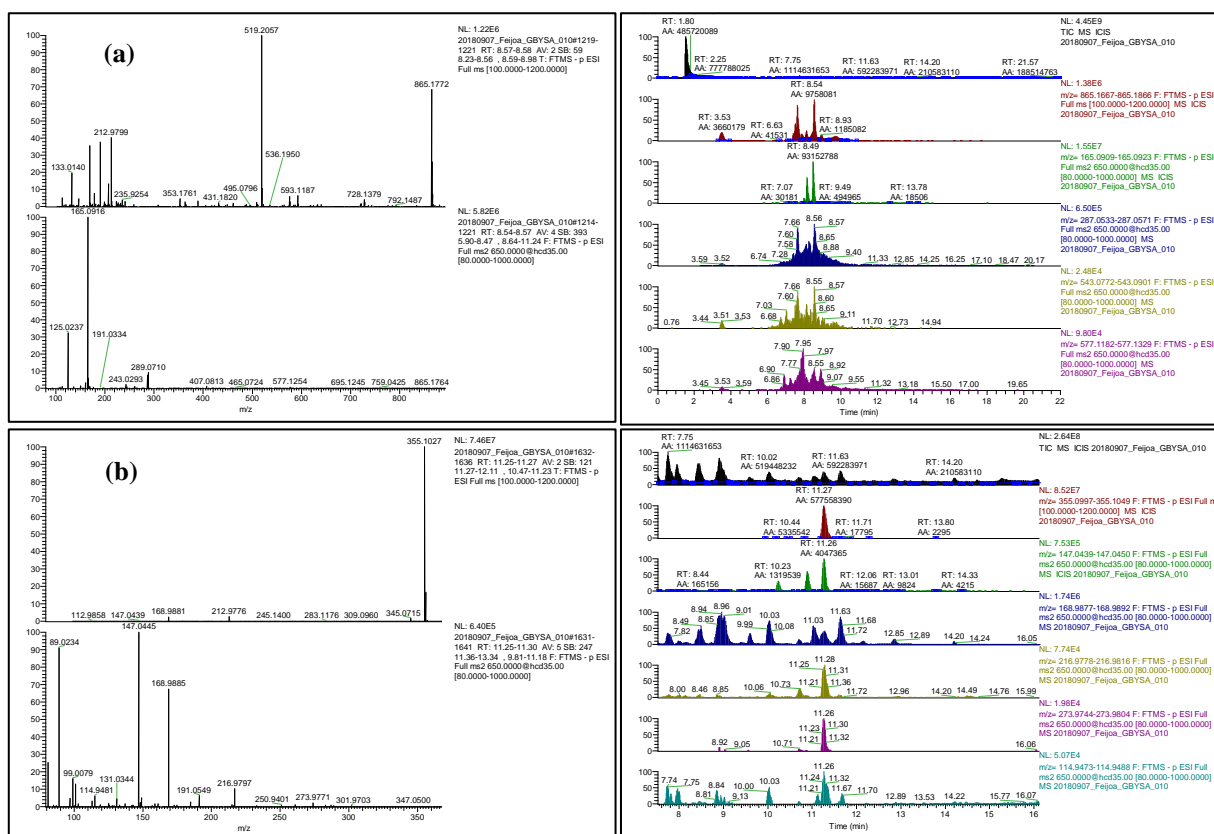

**Figure S5.** Full-MS scan (m/z 100 – 1200) and product ion mass spectra of (a) (most likely) procyanidin trimer (m/z 865.1772) and (b) (most likely) cinnamic acid derivative (m/z 355.1027) in *Diploglottis bracteata* water extract by HRAM-UHPLC-Q/Orbitrap-MS/MS in negative ion mode.

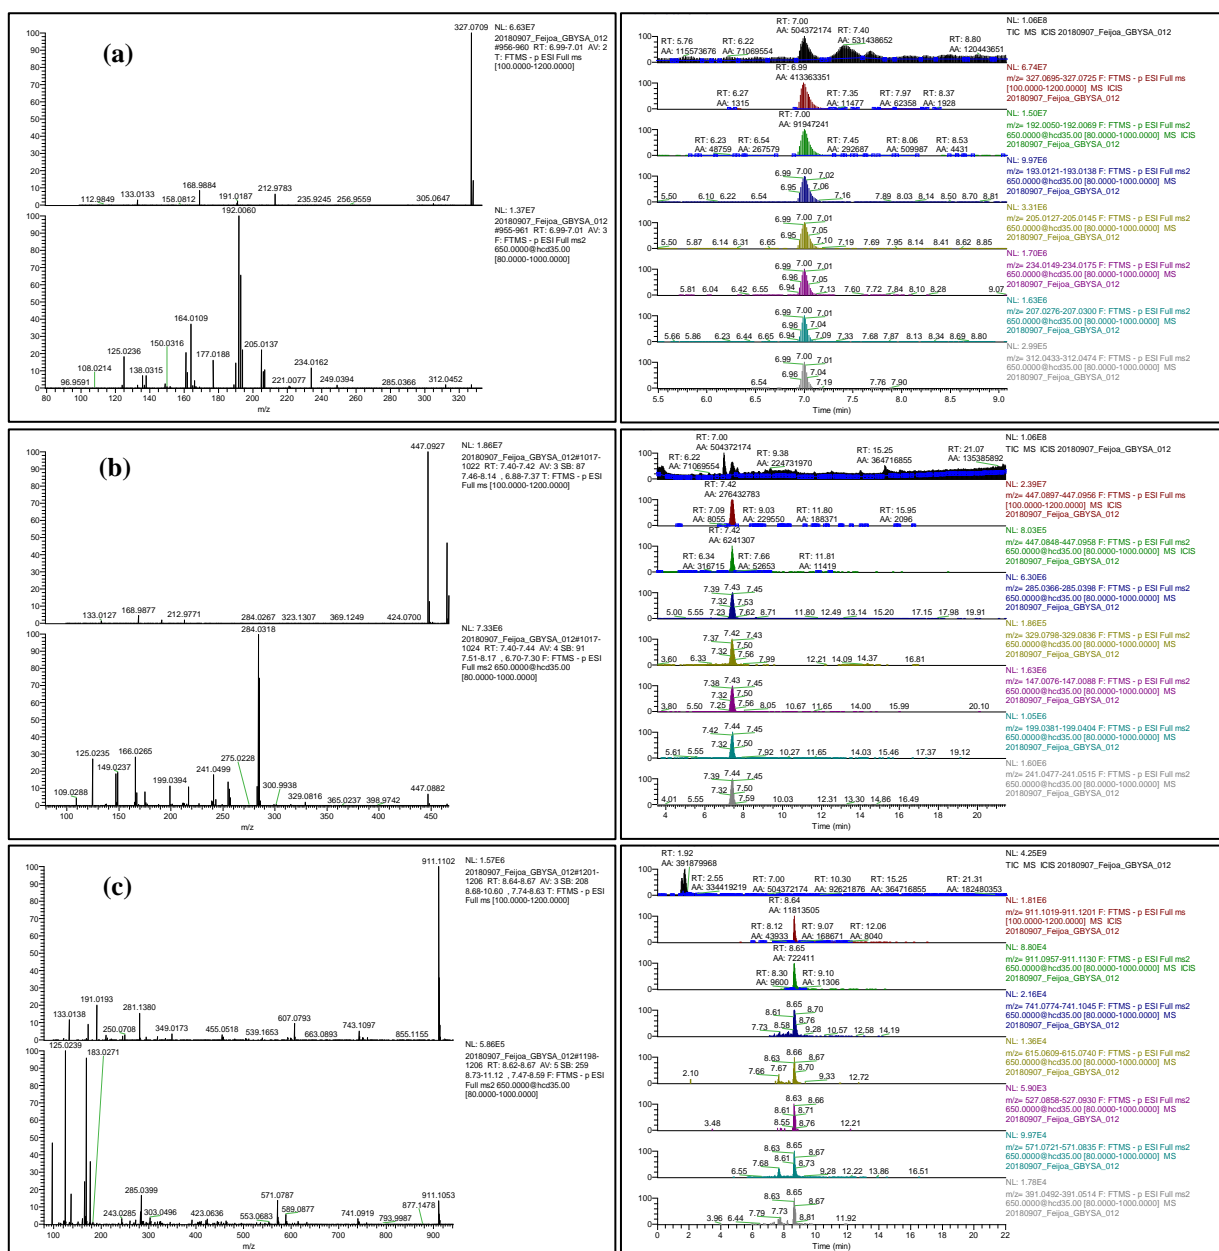

**Figure S6.** Full-MS scan (m/z 100 – 1200) and product ion mass spectra of (a) bergenin (m/z 327.0709), (b) cyanidin-3-glucoside (m/z 447.0927), and (c) theasinesin A (m/z 911.1061) in *Syzygium aqueum* water extract by HRAM-UHPLC-Q/Orbitrap-MS/MS in negative ion mode.

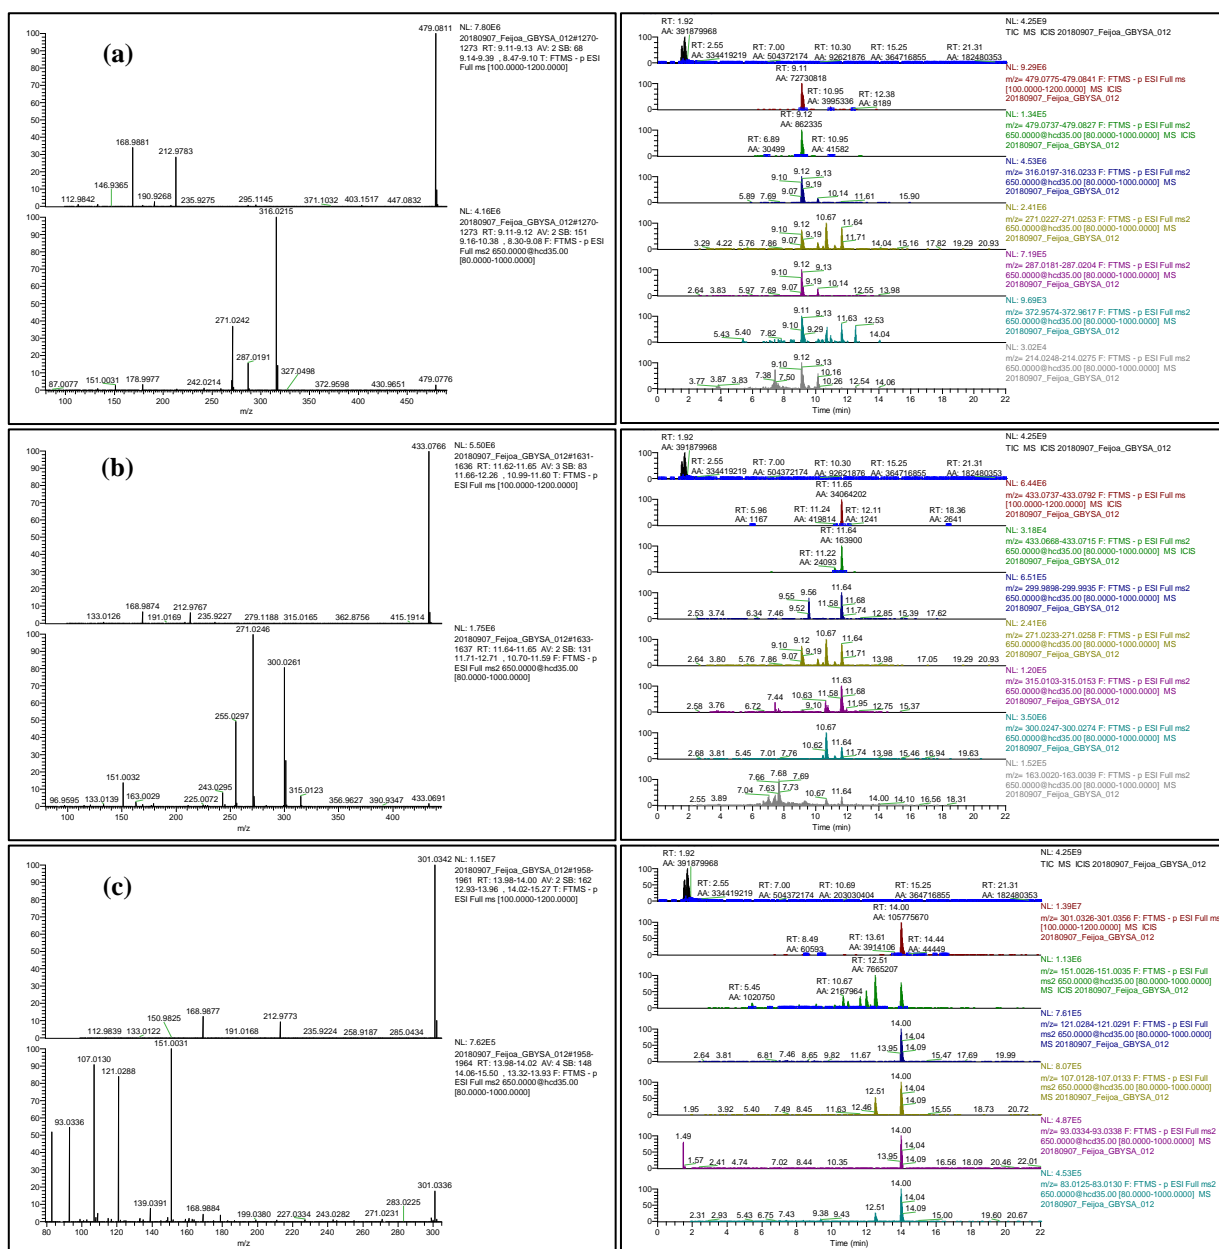

**Figure S7.** Full-MS scan (m/z 100 – 1200) and product ion mass spectra of (a) myricetin-3-O-β-galactopyranoside (m/z 479.0811), (b) quercetin glycoside (m/z 433.0766), and (c) quercetin (m/z 301.0342) in *Syzygium aqueum* water extract by HRAM-UHPLC-Q/Orbitrap-MS/MS in negative ion mode.

**Table S5.** ANOVA for the inhibition zone (mm) of the extracts blend against *Pseudomonas viridiflava* (reduced quadratic model, power transformed (lambda: 1.35; constant: 0); Box-Behnken design).

| Source                | Sum of Squares | df              | Mean Square          | F-value                       | p-value                        |                       |
|-----------------------|----------------|-----------------|----------------------|-------------------------------|--------------------------------|-----------------------|
| <b>Model</b>          | 3992.50        | 6               | 665.42               | 428.33                        | < 0.0001                       | significant           |
| <b>A-TPL</b>          | 0.0354         | 1               | 0.0354               | 0.0228                        | 0.8830                         |                       |
| <b>B-BT</b>           | 849.06         | 1               | 849.06               | 546.54                        | < 0.0001                       |                       |
| <b>C-LP</b>           | 2638.45        | 1               | 2638.45              | 1698.35                       | < 0.0001                       |                       |
| <b>BC</b>             | 220.16         | 1               | 220.16               | 141.72                        | < 0.0001                       |                       |
| <b>B<sup>2</sup></b>  | 63.25          | 1               | 63.25                | 40.72                         | < 0.0001                       |                       |
| <b>C<sup>2</sup></b>  | 207.92         | 1               | 207.92               | 133.84                        | < 0.0001                       |                       |
| <b>Residual</b>       | 15.54          | 10              | 1.55                 |                               |                                |                       |
| <b>Lack of Fit</b>    | 11.36          | 6               | 1.89                 | 1.81                          | 0.2937                         | not significant       |
| <b>Pure Error</b>     | 4.18           | 4               | 1.04                 |                               |                                |                       |
| <b>Cor Total</b>      | 4008.04        | 16              |                      |                               |                                |                       |
| <b>Fit Statistics</b> |                |                 |                      |                               |                                |                       |
| <b>Std. Dev.</b>      | <b>Mean</b>    | <b>C.V. (%)</b> | <b>R<sup>2</sup></b> | <b>Adjusted R<sup>2</sup></b> | <b>Predicted R<sup>2</sup></b> | <b>Adeq Precision</b> |
| 1.25                  | 41.47          | 3.01            | 0.9961               | 0.9938                        | 0.9858                         | 72.4915               |

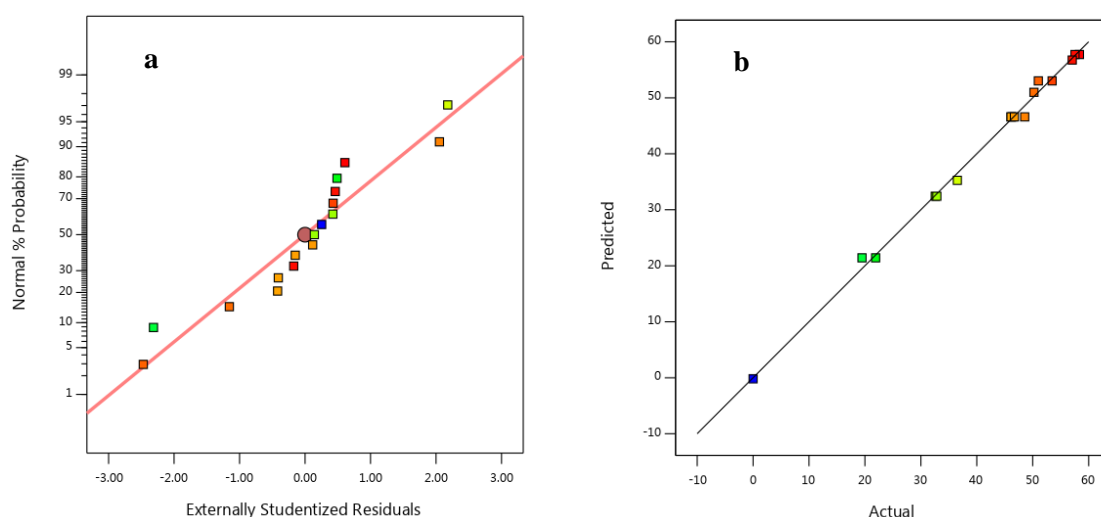

**Figure S8.** Normal plot of residuals (a) and predicted versus actual (b) of the inhibition zone of extract blends against *Pseudomonas viridiflava* (power transformed, lambda 1.35). Colour points by value of Inhibition zone of extracts solution, 0.000  58.355.

**Table S6.** ANOVA for the inhibition zone (mm) of the extracts blend against *Bacillus subtilis* (quadratic model; Box-Behnken design).

| Source                | Sum of Squares | df              | Mean Square          | F-value                       | p-value                        |                       |
|-----------------------|----------------|-----------------|----------------------|-------------------------------|--------------------------------|-----------------------|
| <b>Model</b>          | 346.70         | 9               | 38.52                | 53.74                         | < 0.0001                       | significant           |
| <b>A-TPL</b>          | 107.36         | 1               | 107.36               | 149.76                        | < 0.0001                       |                       |
| <b>B-BT</b>           | 18.63          | 1               | 18.63                | 25.98                         | 0.0014                         |                       |
| <b>C-LP</b>           | 124.35         | 1               | 124.35               | 173.46                        | < 0.0001                       |                       |
| <b>AB</b>             | 4.33           | 1               | 4.33                 | 6.04                          | 0.0436                         |                       |
| <b>AC</b>             | 10.84          | 1               | 10.84                | 15.11                         | 0.0060                         |                       |
| <b>BC</b>             | 15.85          | 1               | 15.85                | 22.12                         | 0.0022                         |                       |
| <b>A<sup>2</sup></b>  | 46.12          | 1               | 46.12                | 64.34                         | < 0.0001                       |                       |
| <b>B<sup>2</sup></b>  | 1.40           | 1               | 1.40                 | 1.95                          | 0.2051                         |                       |
| <b>C<sup>2</sup></b>  | 13.31          | 1               | 13.31                | 18.57                         | 0.0035                         |                       |
| <b>Residual</b>       | 5.02           | 7               | 0.7169               |                               |                                |                       |
| <b>Lack of Fit</b>    | 3.28           | 3               | 1.09                 | 2.51                          | 0.1980                         | not significant       |
| <b>Pure Error</b>     | 1.74           | 4               | 0.4357               |                               |                                |                       |
| <b>Cor Total</b>      | 351.71         | 16              |                      |                               |                                |                       |
| <b>Fit Statistics</b> |                |                 |                      |                               |                                |                       |
| <b>Std. Dev.</b>      | <b>Mean</b>    | <b>C.V. (%)</b> | <b>R<sup>2</sup></b> | <b>Adjusted R<sup>2</sup></b> | <b>Predicted R<sup>2</sup></b> | <b>Adeq Precision</b> |
| 0.8467                | 12.56          | 6.74            | 0.9857               | 0.9674                        | 0.8433                         | 25.2435               |

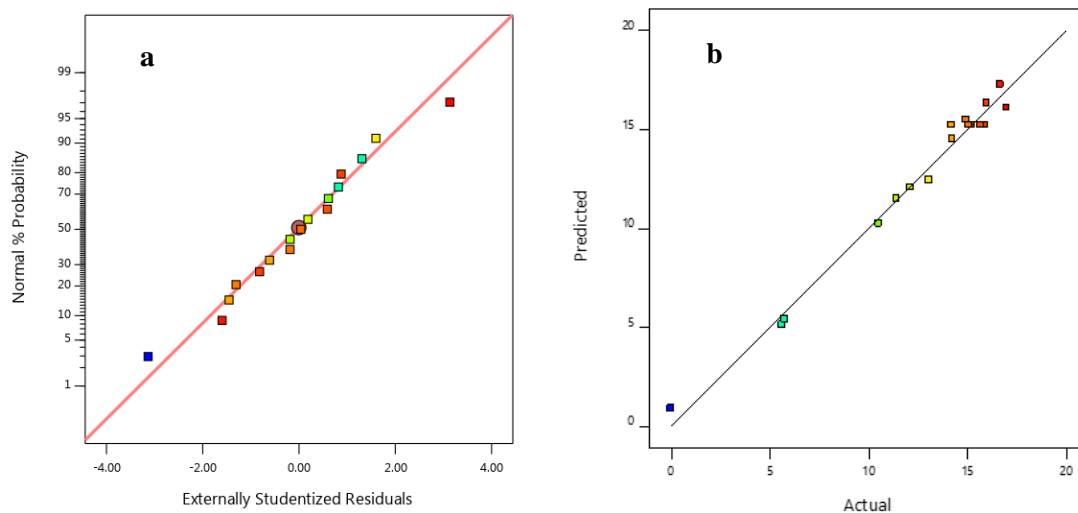

**Figure S9.** Normal plot of residuals (a) and predicted versus actual (b) of the inhibition zone of extract blends against *Bacillus subtilis*. Colour points by value of Inhibition zone of extracts solution, 0 16.9767 .

**Table S7.** ANOVA for the inhibition zone (mm) of the extracts blend against *Rhodotorula diobovata* (reduced quadratic model; Box-Behnken design).

| Source               | Sum of Squares | df | Mean Square | F-value | p-value  |             |
|----------------------|----------------|----|-------------|---------|----------|-------------|
| <b>Model</b>         | 1336.33        | 7  | 190.90      | 59.88   | < 0.0001 | significant |
| <b>A-TPL</b>         | 1059.23        | 1  | 1059.23     | 332.22  | < 0.0001 |             |
| <b>B-BT</b>          | 6.37           | 1  | 6.37        | 2.00    | 0.1913   |             |
| <b>C-LP</b>          | 1.97           | 1  | 1.97        | 0.6179  | 0.4520   |             |
| <b>BC</b>            | 31.72          | 1  | 31.72       | 9.95    | 0.0117   |             |
| <b>A<sup>2</sup></b> | 179.33         | 1  | 179.33      | 56.25   | < 0.0001 |             |
| <b>B<sup>2</sup></b> | 16.77          | 1  | 16.77       | 5.26    | 0.0475   |             |
| <b>C<sup>2</sup></b> | 23.96          | 1  | 23.96       | 7.51    | 0.0228   |             |
| <b>Residual</b>      | 28.70          | 9  | 3.19        |         |          |             |
| <b>Lack of Fit</b>   | 27.29          | 5  | 5.46        | 15.49   | 0.0100   | significant |
| <b>Pure Error</b>    | 1.41           | 4  | 0.3524      |         |          |             |
| <b>Cor Total</b>     | 1365.02        | 16 |             |         |          |             |

  

|                       |             |                 |                      |                               |                                |                       |  |
|-----------------------|-------------|-----------------|----------------------|-------------------------------|--------------------------------|-----------------------|--|
| <i>Fit Statistics</i> |             |                 |                      |                               |                                |                       |  |
| <b>Std. Dev.</b>      | <b>Mean</b> | <b>C.V. (%)</b> | <b>R<sup>2</sup></b> | <b>Adjusted R<sup>2</sup></b> | <b>Predicted R<sup>2</sup></b> | <b>Adeq Precision</b> |  |
| 1.79                  | 15.09       | 11.83           | 0.9790               | 0.9626                        | 0.8103                         | 20.2444               |  |

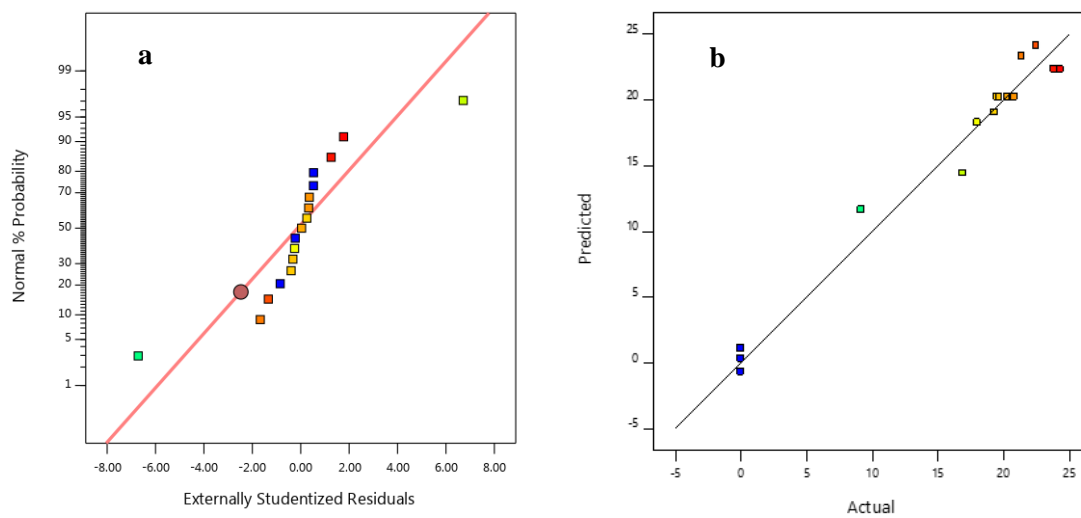

**Figure S10.** Normal plot of residuals (a) and predicted versus actual (b) of the inhibition zone of extract blends against *Rhodotorula diobovata*. Colour points by value of Inhibition zone of extracts solution, 0  24.3267.

**Table S8.** ANOVA for the inhibition zone (mm) of the extracts blend against *Alternaria alternata* (reduced quadratic model; Box-Behnken design).

| Source                | Sum of Squares | df              | Mean Square          | F-value                       | p-value                        |                       |
|-----------------------|----------------|-----------------|----------------------|-------------------------------|--------------------------------|-----------------------|
| <b>Model</b>          | 58.43          | 6               | 9.74                 | 13.06                         | 0.0003                         | significant           |
| <b>A-TPL</b>          | 37.83          | 1               | 37.83                | 50.75                         | < 0.0001                       |                       |
| <b>B-BT</b>           | 0.0011         | 1               | 0.0011               | 0.0015                        | 0.9703                         |                       |
| <b>C-LP</b>           | 3.81           | 1               | 3.81                 | 5.12                          | 0.0472                         |                       |
| <b>BC</b>             | 8.97           | 1               | 8.97                 | 12.03                         | 0.0060                         |                       |
| <b>A<sup>2</sup></b>  | 3.20           | 1               | 3.20                 | 4.29                          | 0.0653                         |                       |
| <b>B<sup>2</sup></b>  | 5.04           | 1               | 5.04                 | 6.76                          | 0.0265                         |                       |
| <b>Residual</b>       | 7.45           | 10              | 0.7455               |                               |                                |                       |
| <b>Lack of Fit</b>    | 6.70           | 6               | 1.12                 | 5.95                          | 0.0531                         | not significant       |
| <b>Pure Error</b>     | 0.7516         | 4               | 0.1879               |                               |                                |                       |
| <b>Cor Total</b>      | 65.88          | 16              |                      |                               |                                |                       |
| <b>Fit Statistics</b> |                |                 |                      |                               |                                |                       |
| <b>Std. Dev.</b>      | <b>Mean</b>    | <b>C.V. (%)</b> | <b>R<sup>2</sup></b> | <b>Adjusted R<sup>2</sup></b> | <b>Predicted R<sup>2</sup></b> | <b>Adeq Precision</b> |
| 0.8634                | 2.64           | 32.73           | 0.8869               | 0.8190                        | 0.5613                         | 12.6414               |

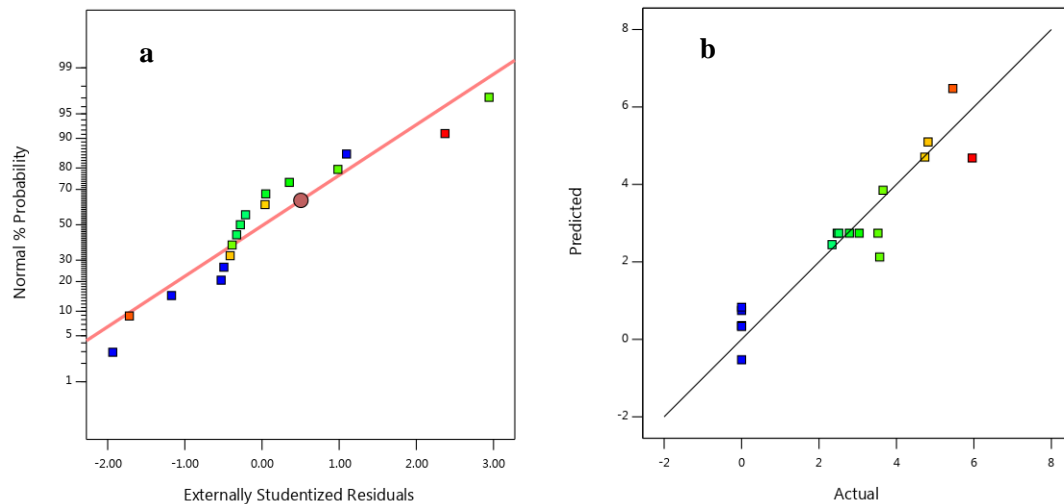

**Figure S11.** Normal plot of residuals (a) and predicted versus actual (b) of the inhibition zone of extract blends against *Alternaria alternata*. Colour points by value of Inhibition zone of extracts solution, .



**Table S9.** ANOVA for the inhibition zone (mm) of the extracts blend against *Pseudomonas viridiflava* (quadratic model; mixture design).

| Source                        | Sum of Squares | df       | Mean Square    | F-value                 | p-value                  |                 |
|-------------------------------|----------------|----------|----------------|-------------------------|--------------------------|-----------------|
| Model                         | 441.73         | 5        | 88.35          | 85.69                   | < 0.0001                 | significant     |
| <sup>(a)</sup> Linear Mixture | 401.72         | 2        | 200.86         | 194.83                  | < 0.0001                 |                 |
| AB                            | 12.79          | 1        | 12.79          | 12.41                   | 0.0078                   |                 |
| AC                            | 27.03          | 1        | 27.03          | 26.22                   | 0.0009                   |                 |
| BC                            | 0.0535         | 1        | 0.0535         | 0.0519                  | 0.8255                   |                 |
| Residual                      | 8.25           | 8        | 1.03           |                         |                          |                 |
| Lack of Fit                   | 5.90           | 4        | 1.47           | 2.51                    | 0.1971                   | not significant |
| Pure Error                    | 2.35           | 4        | 0.5872         |                         |                          |                 |
| Cor Total                     | 449.97         | 13       |                |                         |                          |                 |
| <i>Fit Statistics</i>         |                |          |                |                         |                          |                 |
| Std. Dev.                     | Mean           | C.V. (%) | R <sup>2</sup> | Adjusted R <sup>2</sup> | Predicted R <sup>2</sup> | Adeq Precision  |
| 1.02                          | 12.10          | 8.39     | 0.9817         | 0.9702                  | 0.9509                   | 27.6336         |

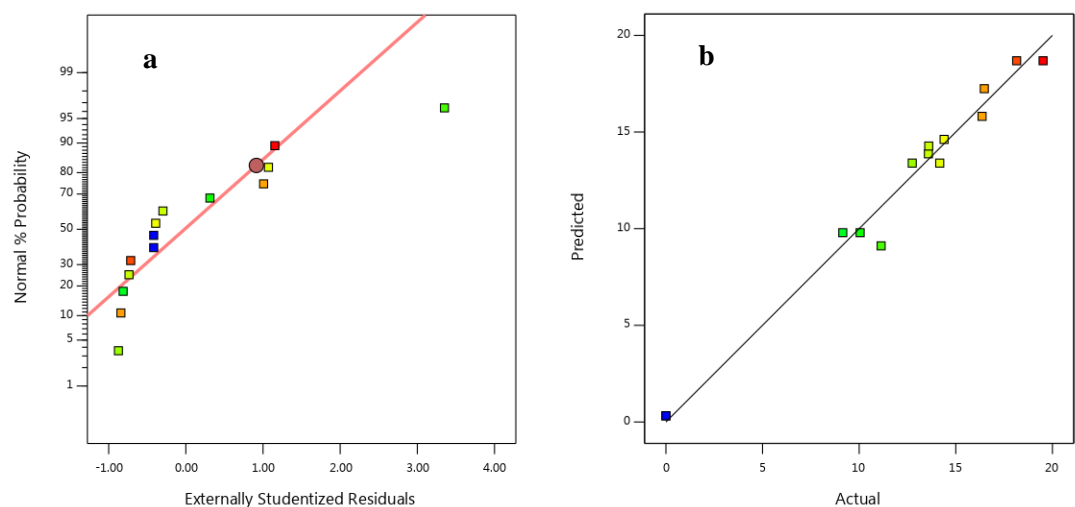

**Figure S12.** Normal plot of residuals (a) and predicted versus actual (b) of the inhibition zone of extract blends against *Pseudomonas viridiflava* (mixture design). Colour points by value of Inhibition zone of extracts solution, 0  19.5167 .

**Table S10.** ANOVA for the inhibition zone (mm) of the extracts blend against *Bacillus subtilis* (reduced quadratic model; mixture design).

| Source                | Sum of Squares | df       | Mean Square    | F-value                 | p-value                  |                 |
|-----------------------|----------------|----------|----------------|-------------------------|--------------------------|-----------------|
| Model                 | 50.81          | 4        | 12.70          | 7.43                    | 0.0063                   | significant     |
| <sup>(a)</sup> Linear | 25.17          | 2        | 12.58          | 7.36                    | 0.0128                   |                 |
| Mixture               |                |          |                |                         |                          |                 |
| AB                    | 13.90          | 1        | 13.90          | 8.13                    | 0.0191                   |                 |
| AC                    | 11.69          | 1        | 11.69          | 6.83                    | 0.0281                   |                 |
| Residual              | 15.39          | 9        | 1.71           |                         |                          |                 |
| Lack of Fit           | 10.06          | 5        | 2.01           | 1.51                    | 0.3558                   | not significant |
| Pure Error            | 5.34           | 4        | 1.33           |                         |                          |                 |
| Cor Total             | 66.20          | 13       |                |                         |                          |                 |
| <i>Fit Statistics</i> |                |          |                |                         |                          |                 |
| Std. Dev.             | Mean           | C.V. (%) | R <sup>2</sup> | Adjusted R <sup>2</sup> | Predicted R <sup>2</sup> | Adeq Precision  |
| 1.31                  | 10.77          | 12.15    | 0.7675         | 0.6641                  | 0.5153                   | 8.5557          |

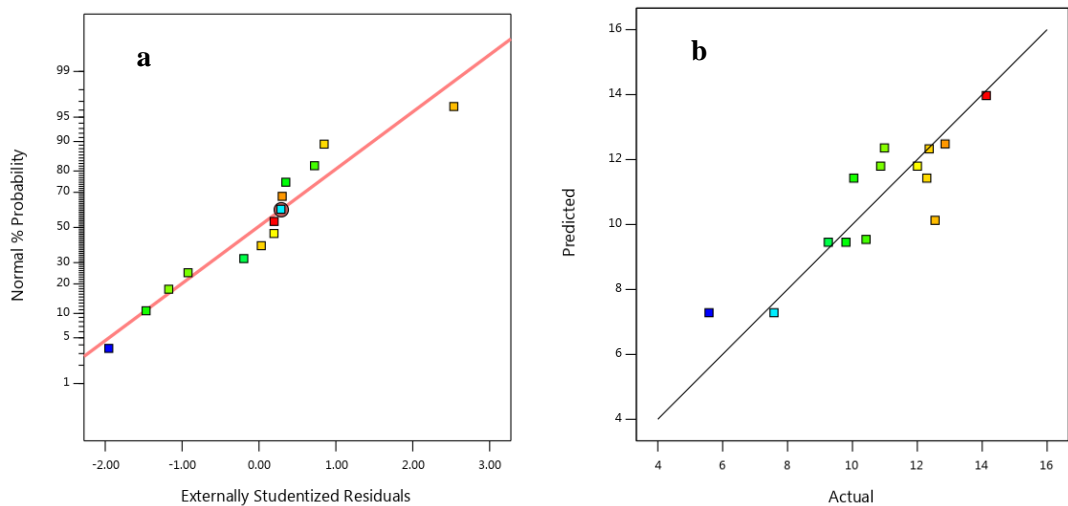

**Figure S13.** Normal plot of residuals (a) and predicted versus actual (b) of the inhibition zone of extract blends against *Bacillus subtilis* (mixture design). Colour points by value of Inhibition zone of extracts solution, 5.58 14.1267 .

**Table S11.** ANOVA for the inhibition zone (mm) of the extracts blend against *Rhodotorula diobovata* (reduced quadratic model, square root transformed, constant 0.5; mixture design).

| Source                              | Sum of Squares | df              | Mean Square          | F-value                       | p-value                        |                       |
|-------------------------------------|----------------|-----------------|----------------------|-------------------------------|--------------------------------|-----------------------|
| <b>Model</b>                        | 42.45          | 4               | 10.61                | 431.83                        | < 0.0001                       | significant           |
| <b>(<sup>o</sup>)Linear Mixture</b> | 33.17          | 2               | 16.59                | 674.84                        | < 0.0001                       |                       |
| <b>AB</b>                           | 4.81           | 1               | 4.81                 | 195.87                        | < 0.0001                       |                       |
| <b>AC</b>                           | 4.45           | 1               | 4.45                 | 180.95                        | < 0.0001                       |                       |
| <b>Residual</b>                     | 0.2212         | 9               | 0.0246               |                               |                                |                       |
| <b>Lack of Fit</b>                  | 0.2002         | 5               | 0.0400               | 7.63                          | 0.0357                         | significant           |
| <b>Pure Error</b>                   | 0.0210         | 4               | 0.0052               |                               |                                |                       |
| <b>Cor Total</b>                    | 42.67          | 13              |                      |                               |                                |                       |
| <b>Fit Statistics</b>               |                |                 |                      |                               |                                |                       |
| <b>Std. Dev.</b>                    | <b>Mean</b>    | <b>C.V. (%)</b> | <b>R<sup>2</sup></b> | <b>Adjusted R<sup>2</sup></b> | <b>Predicted R<sup>2</sup></b> | <b>Adeq Precision</b> |
| 0.1568                              | 2.84           | 5.52            | 0.9948               | 0.9925                        | 0.9906                         | 45.6061               |

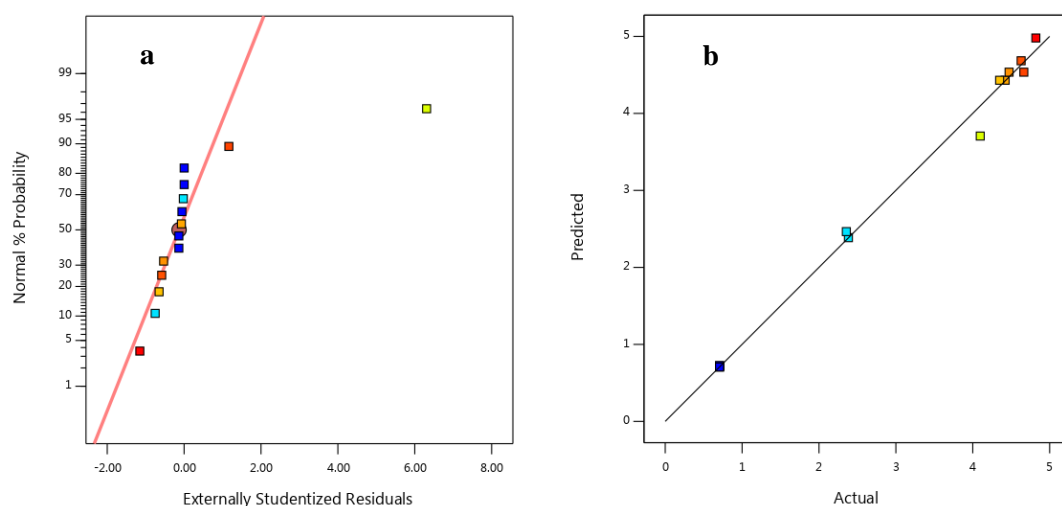

**Figure S14.** Normal plot of residuals (a) and predicted versus actual (b) of the inhibition zone of extract blends against *Rhodotorula diobovata* (mixture design). Colour points by value of square root of (inhibition zone of extracts solution + 0.5), 0.707  4.820 .

**Table S12.** ANOVA for the inhibition zone (mm) of the extracts blend against *Alternaria alternata* (reduced quadratic model, square root transformed, constant 0.5; mixture design).

| Source                | Sum of Squares | df       | Mean Square    | F-value                 | p-value                  |                 |
|-----------------------|----------------|----------|----------------|-------------------------|--------------------------|-----------------|
| Model                 | 6.48           | 4        | 1.62           | 19.38                   | 0.0002                   | significant     |
| Linear Mixture        | 5.19           | 2        | 2.60           | 31.05                   | < 0.0001                 |                 |
| AB                    | 0.9964         | 1        | 0.9964         | 11.91                   | 0.0073                   |                 |
| AC                    | 0.2903         | 1        | 0.2903         | 3.47                    | 0.0954                   |                 |
| Residual              | 0.7527         | 9        | 0.0836         |                         |                          |                 |
| Lack of Fit           | 0.3595         | 5        | 0.0719         | 0.7315                  | 0.6365                   | not significant |
| Pure Error            | 0.3932         | 4        | 0.0983         |                         |                          |                 |
| Cor Total             | 7.24           | 13       |                |                         |                          |                 |
| <i>Fit Statistics</i> |                |          |                |                         |                          |                 |
| Std. Dev.             | Mean           | C.V. (%) | R <sup>2</sup> | Adjusted R <sup>2</sup> | Predicted R <sup>2</sup> | Adeq Precision  |
| 0.2892                | 1.67           | 17.33    | 0.8960         | 0.8497                  | 0.7116                   | 10.4282         |

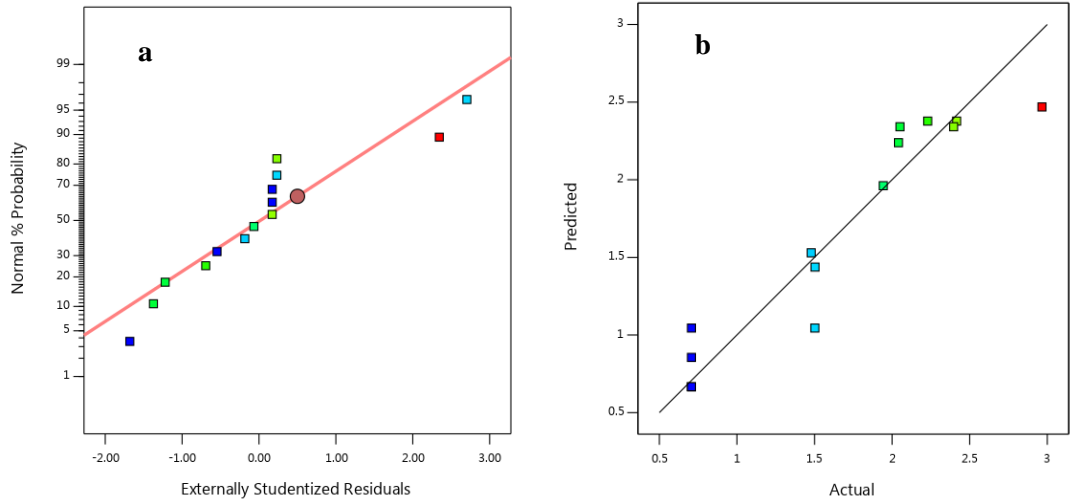

**Figure S15.** Normal plot of residuals (a) and predicted versus actual (b) of the inhibition zone of extract blends against *Alternaria alternata* (mixture design). Colour points by value of square root of (inhibition zone of extracts solution + 0.5), 0.707 2.966
